# Supplementary material
Source: PubMed Central journal article supplement (PMC3202646)
Supplement: NIHMS324944-supplement-1_si_001.pdf [file NIHMS324944-supplement-1_si_001.pdf]

**Interface Determination and Dynamics of Apolipoprotein E Oligomerization by  
Hydrogen Deuterium Exchange and Electron-Transfer Dissociation Mass  
Spectrometry**

*Richard Y-C. Huang, Kanchan Garai, Carl Frieden, Michael L. Gross*

**Supporting information**

**SUPPLEMENTAL FIGURES**

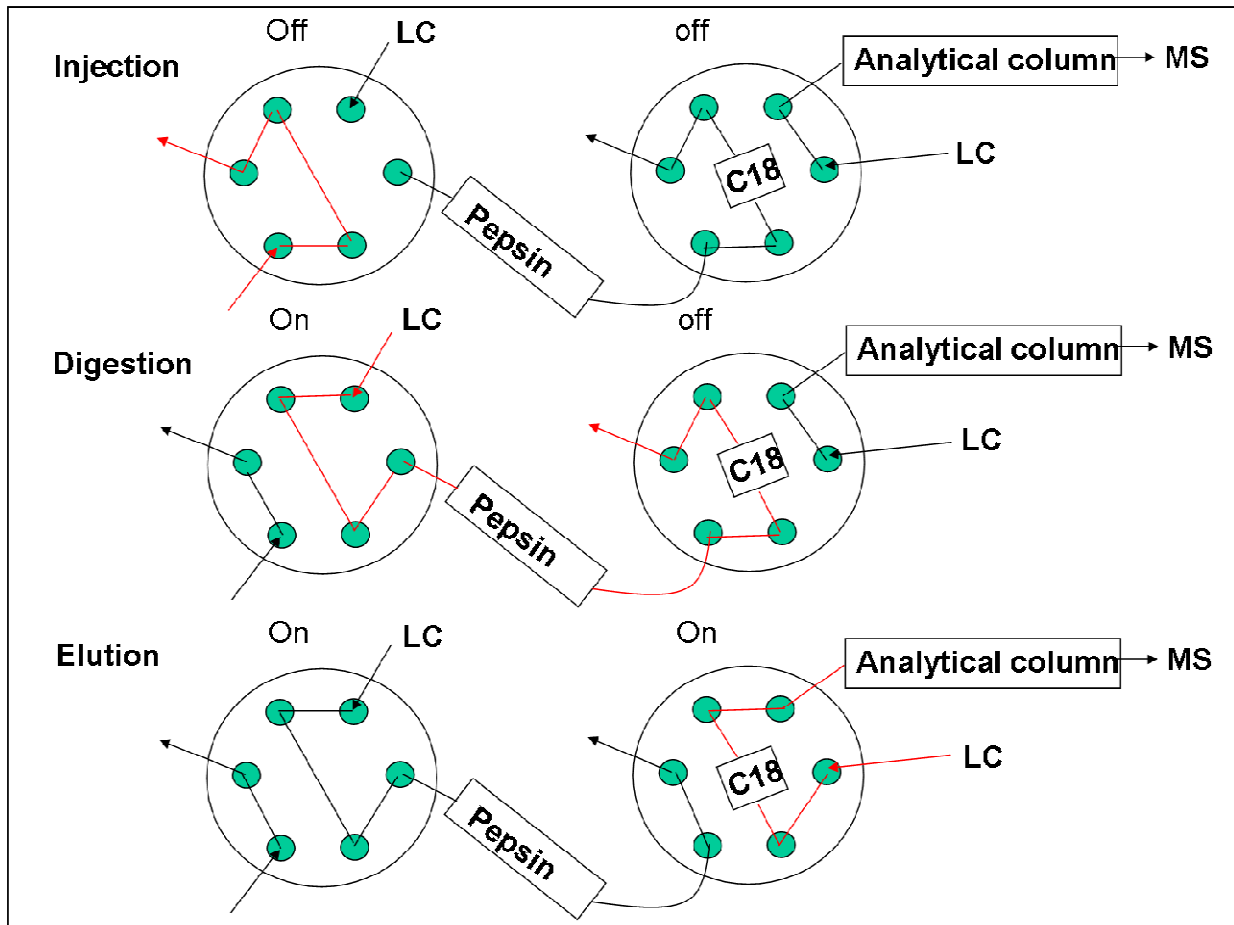

**Figure S1.** Diagram for on-line pepsin digestion device.

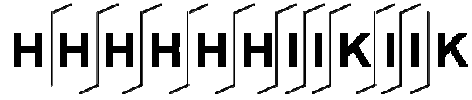

01282011-peptide-ETD-control #146-156 RT: 1.81-2.04 AV: 11 NL: 1.58E5  
 T: PMS + c ESI Full ms2 388.22@etd200.00 [105.00-2000.00]

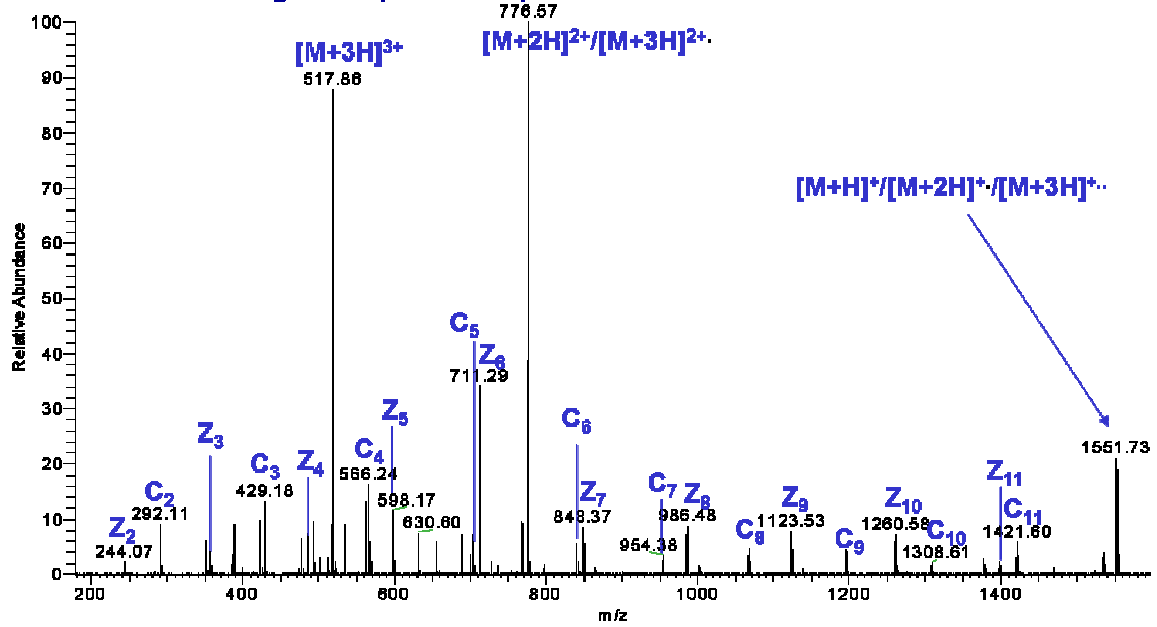

Figure S2. ETD product ion spectrum of standard peptide HHHHHHHIIKIIK.

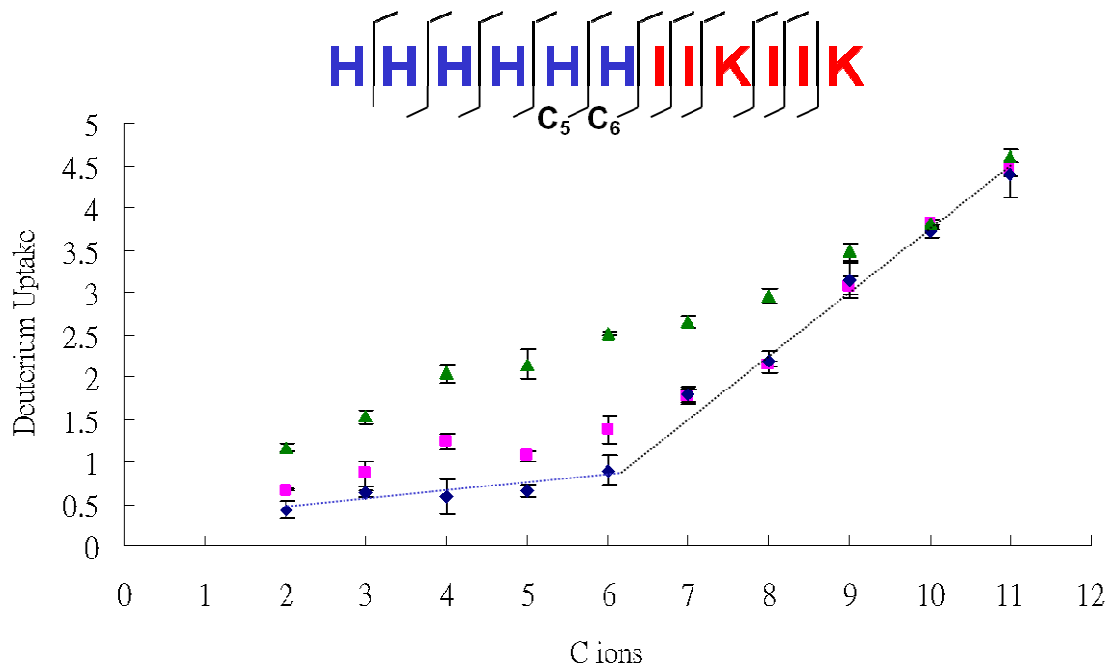

|   | Capillary Temperature | Capillary Voltage | Tube lens |
|---|-----------------------|-------------------|-----------|
| ☆ | 50 ° C                | 20 V              | 50 V      |
|   | 100 ° C               | 50 V              | 50 V      |
|   | 200 ° C               | 100 V             | 100 V     |

**Figure S3.** The deuterium uptake of C ions of the standard peptide HHHHHHHIHKIIK after performing the H/DX-ETD. Three different ESI conditions were marked in different colors (blue, pink, and green).

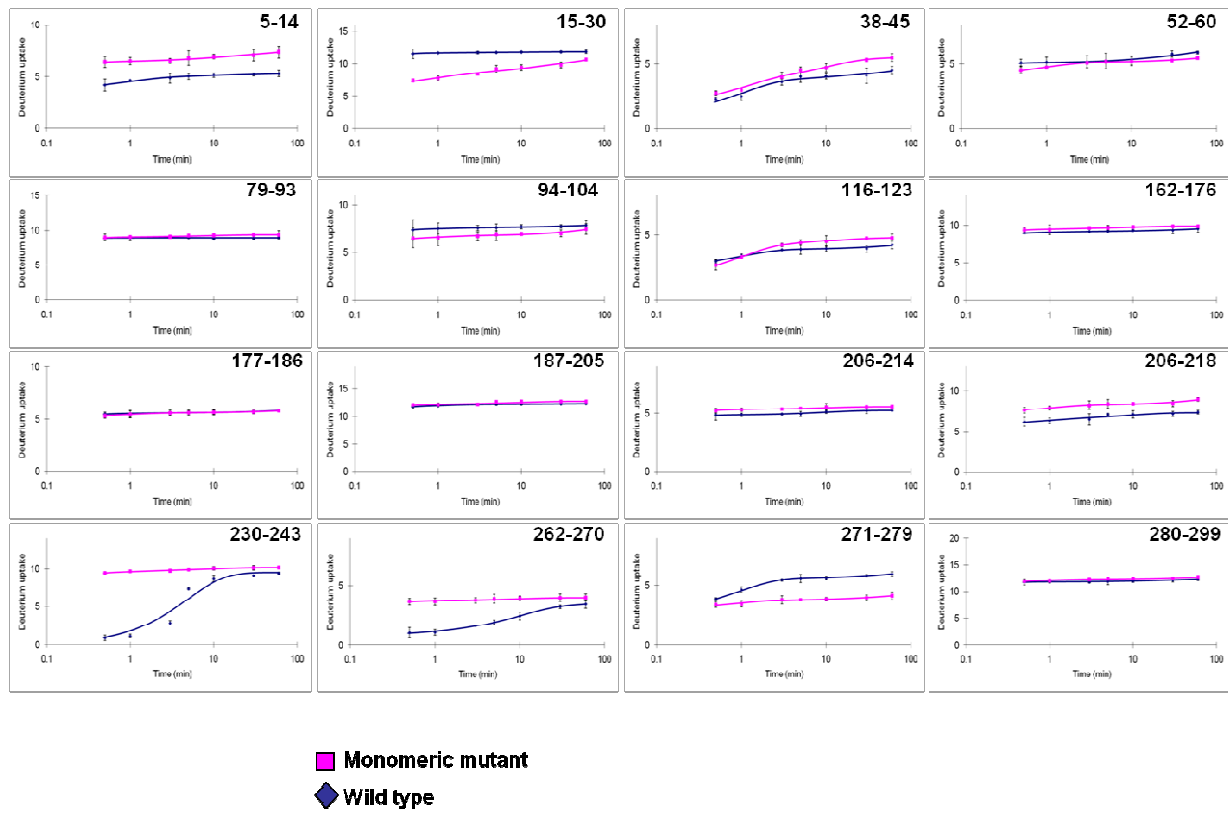

**Figure S4.** Peptide-level H/DX kinetics of ApoE2. The extent of deuterium uptake is plotted as a function of exchange time. Wild type is marked in blue and monomeric mutant is marked in pink.

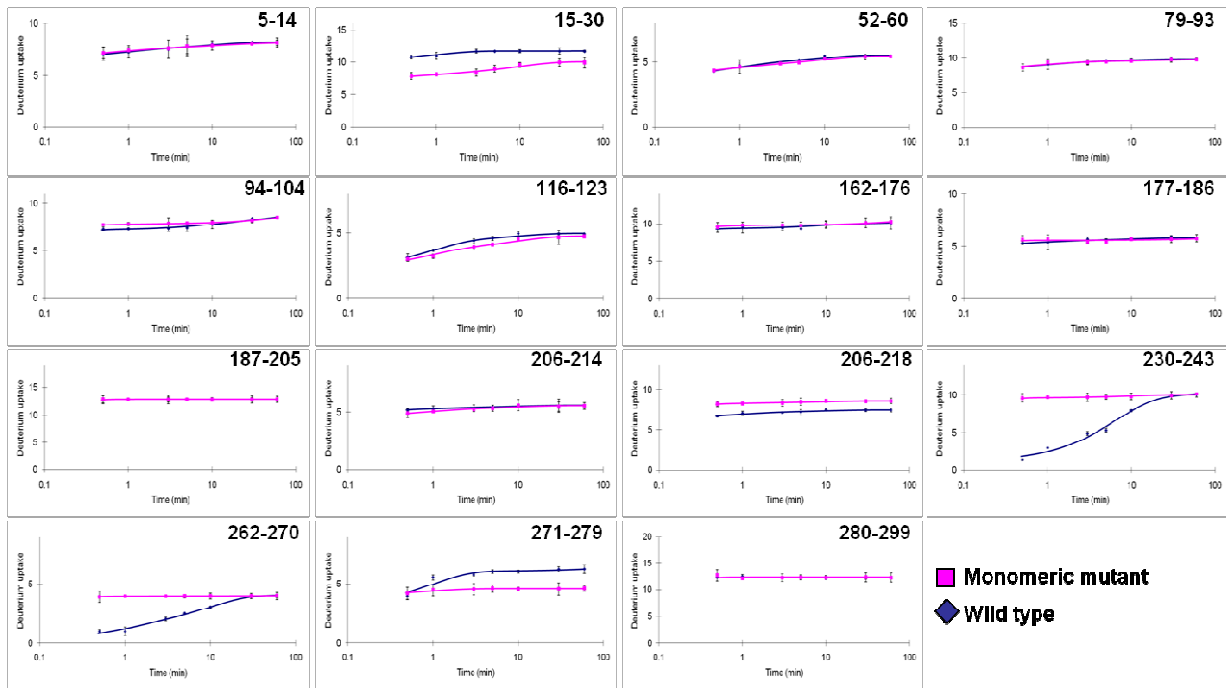

**Figure S5.** Peptide-level H/DX kinetics of ApoE3. The extent of deuterium uptake is plotted as a function of exchange time. Wild type is marked in blue and monomeric mutant is marked in pink.

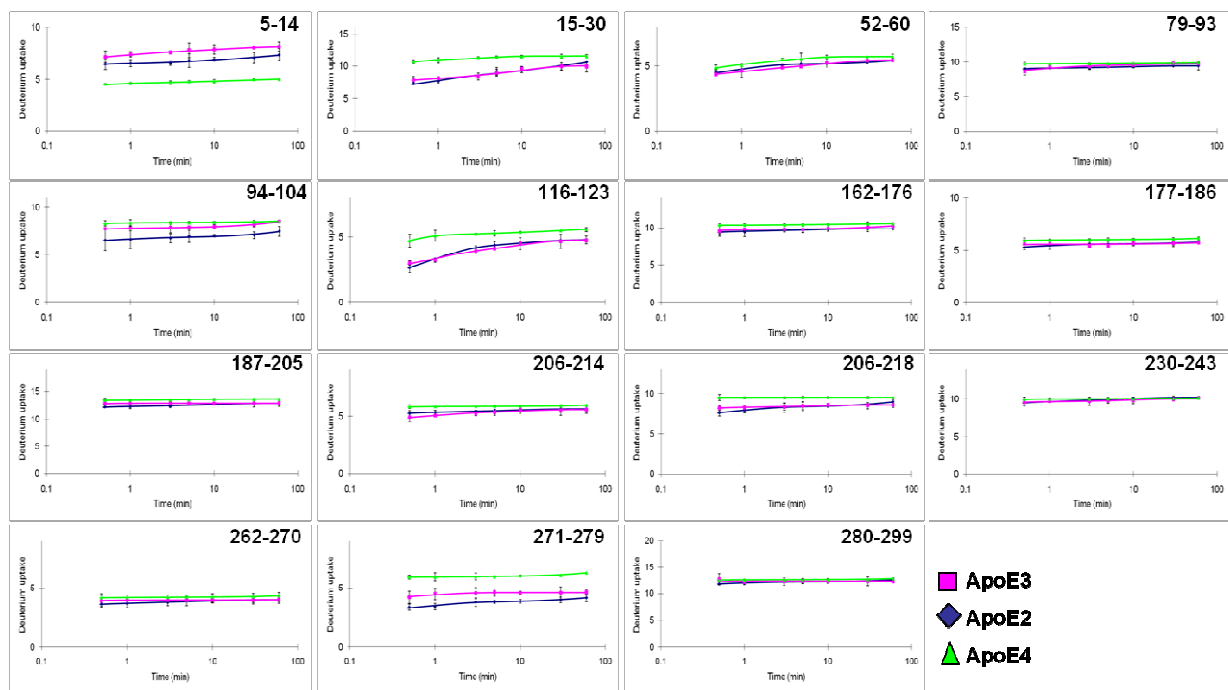

**Figure S6.** Peptide-level H/DX kinetics of ApoE2, ApoE3 and ApoE4 monomeric mutant. The extent of deuterium uptake is plotted as a function of exchange time. ApoE2 is marked in blue, ApoE3 is marked in pink, and ApoE4 is marked in green.

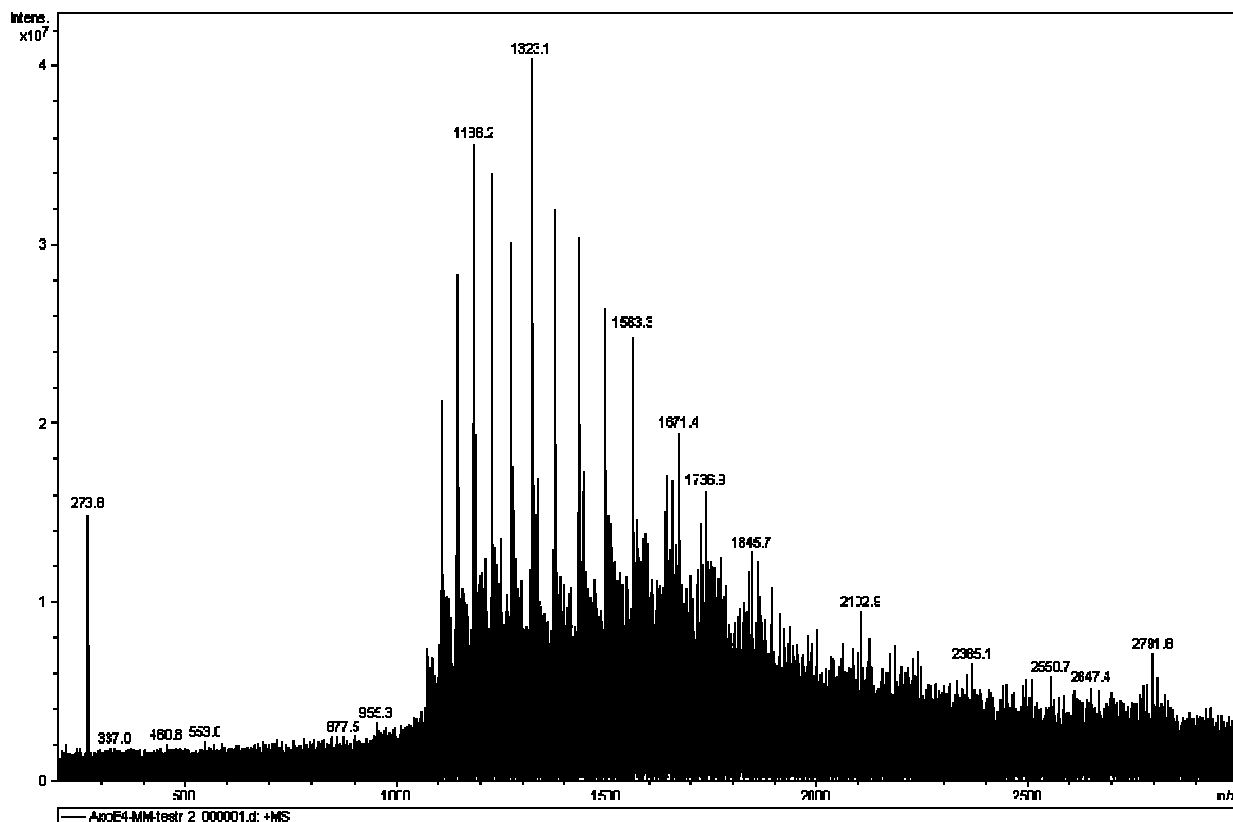

**Figure S7.** The ESI spectrum of ApoE4 monomeric mutant. The presence of multiple peaks with lower relative abundance in between the major protein charge state distribution indicates that sample solution contains mixture of proteins with multiple modifications.



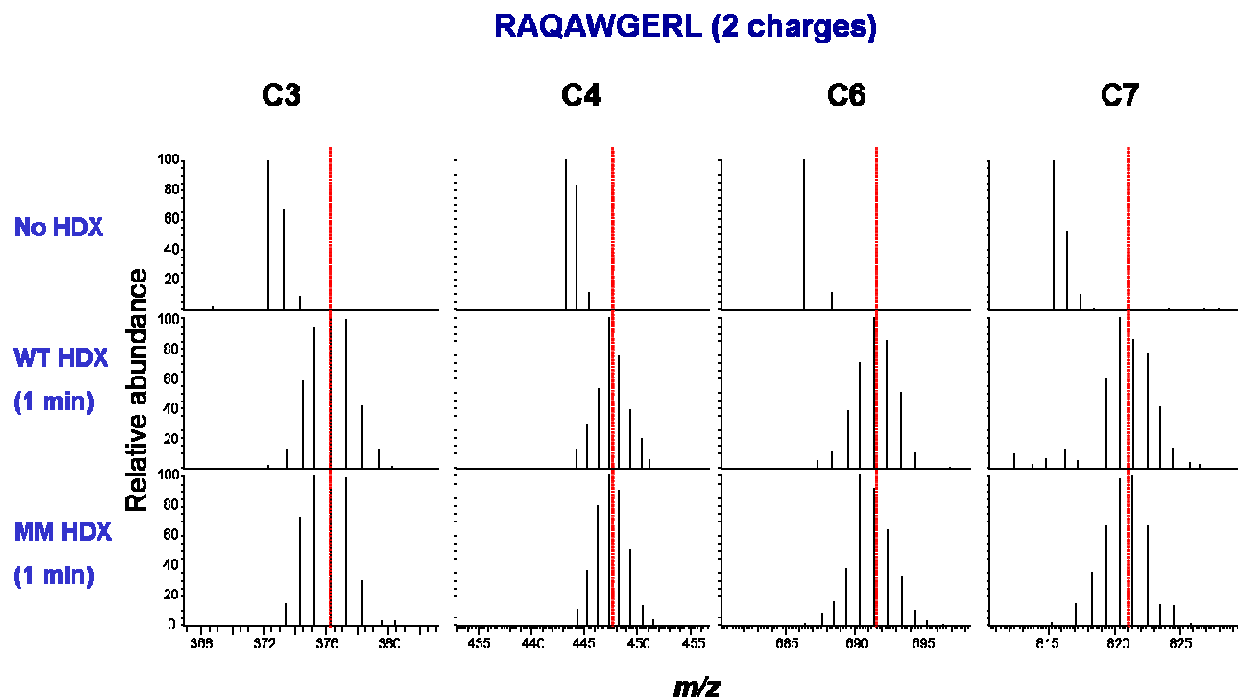

**Figure S8.** ETD product-ion spectra of peptides 206-214 of ApoE4 after H/DX. The centroid of the distribution of C ions from MM is shown as red dotted line, showing there are no significant differences in H/DX between WT and MM.

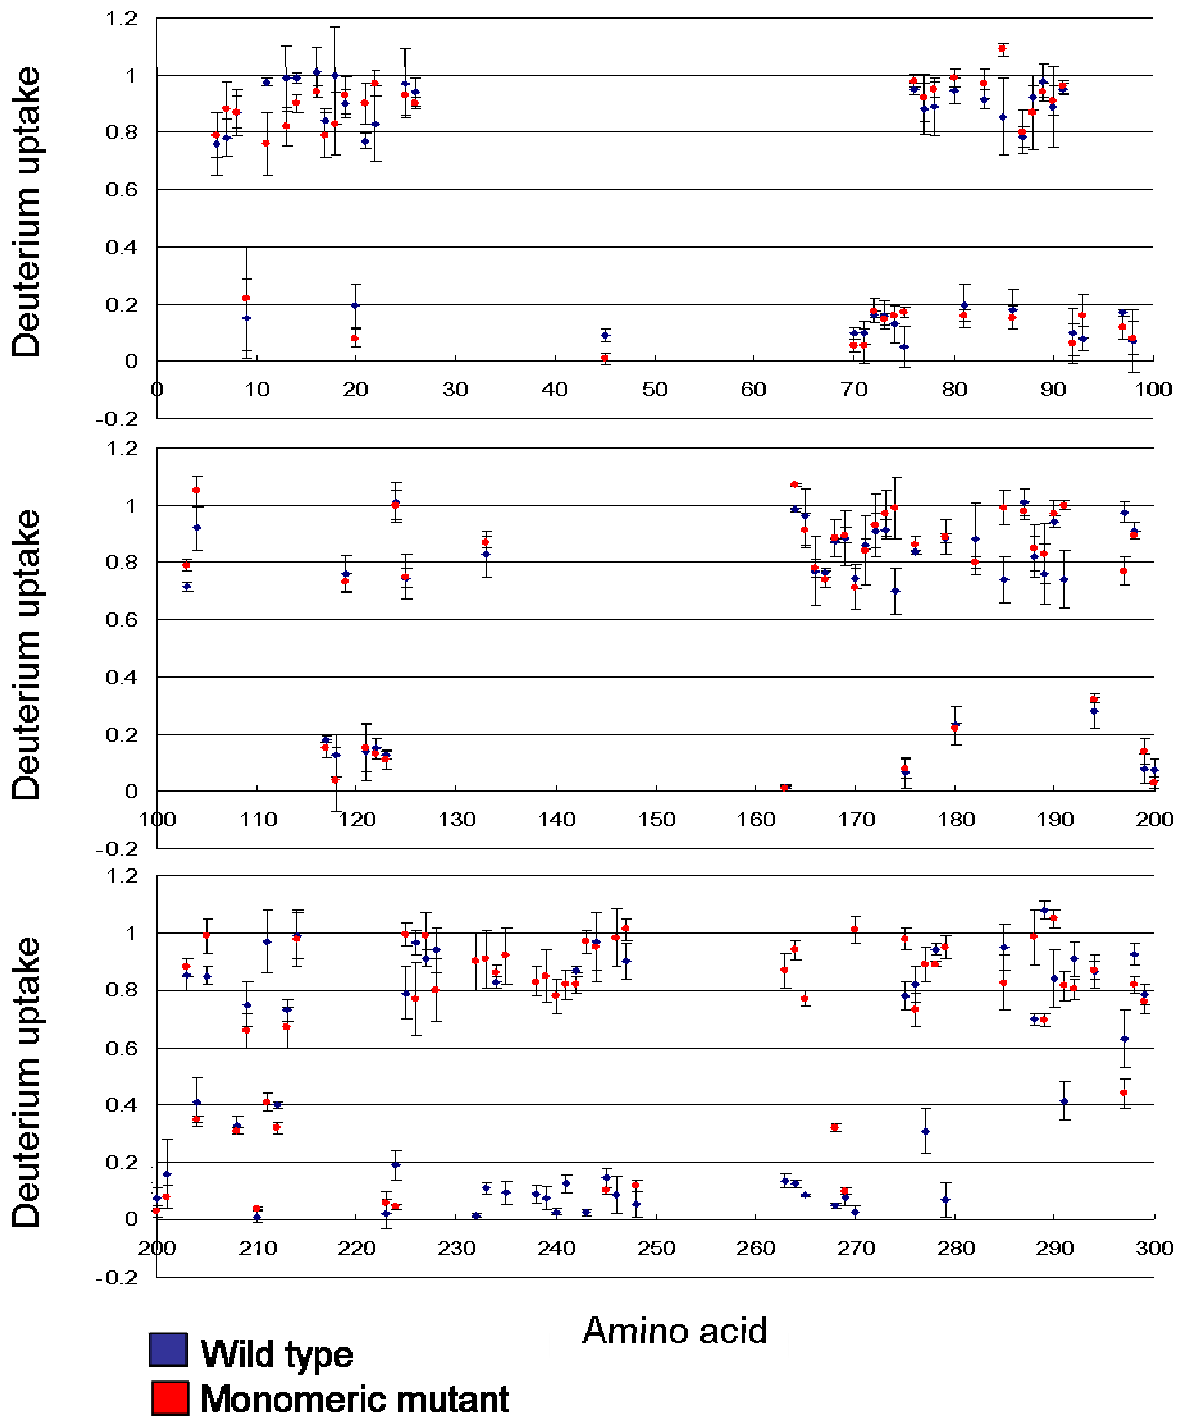

**Figure S9.** The extent of deuterium uptake of each residue of ApoE4. Several residues in C-terminus of wild type (blue) have lower level ( $<0.3D$ ) of deuterium uptake compared to monomeric mutant (red).

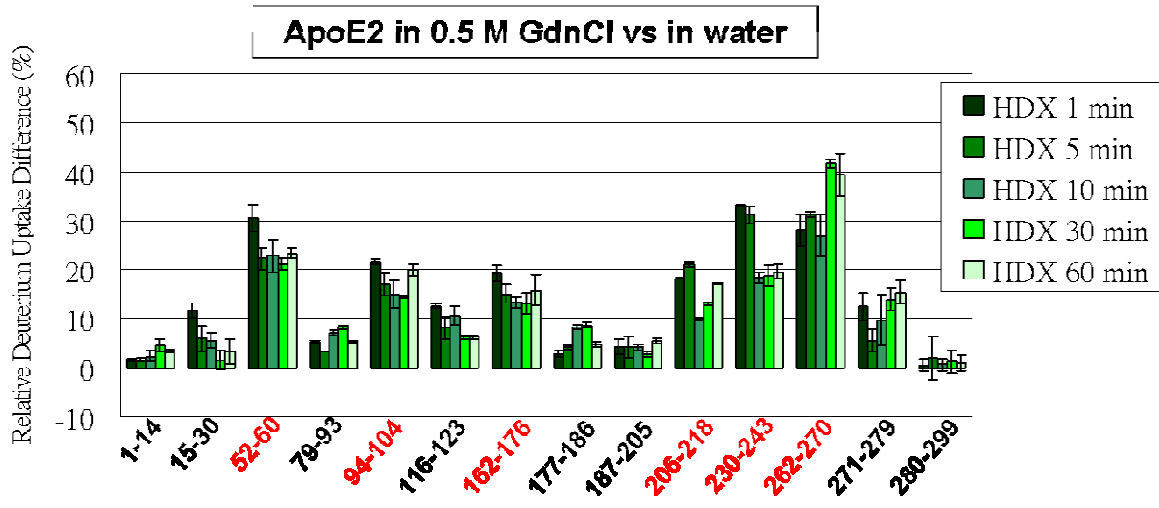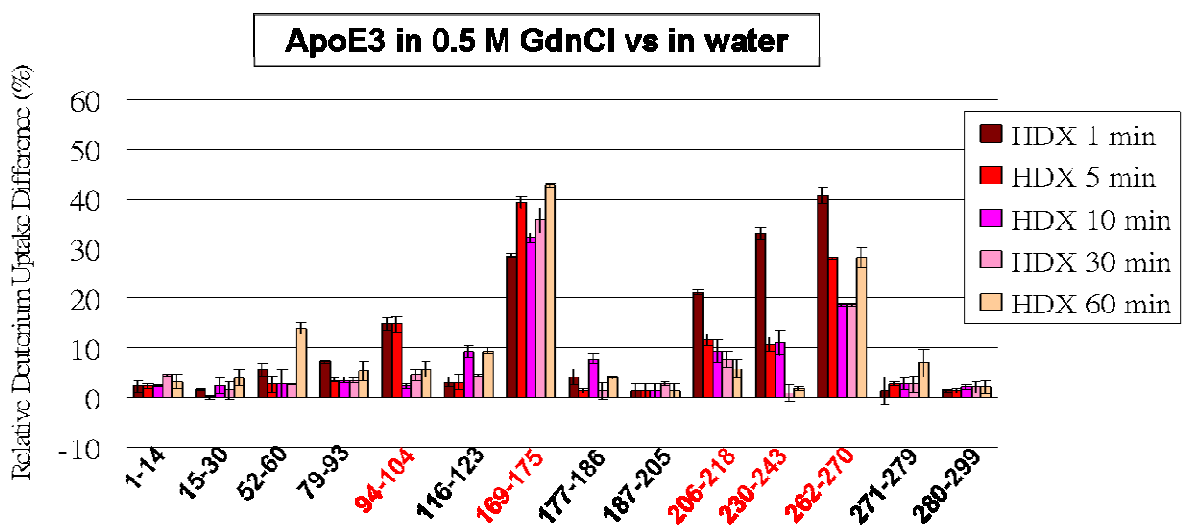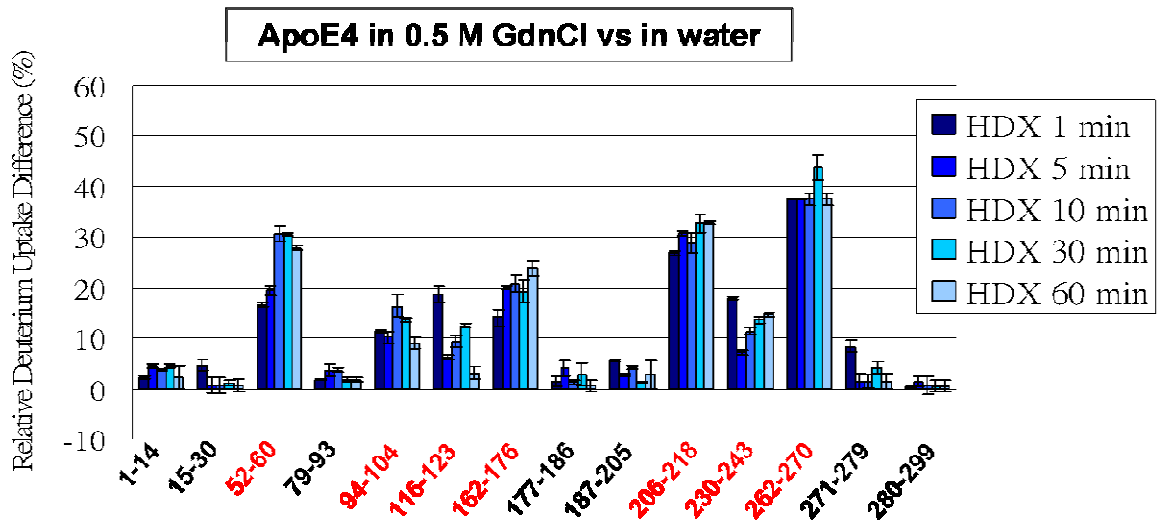

**Figure S10.** Peptide-level H/DX of ApoE2, ApoE3, and ApoE4 with or without the presence of 0.5 M GdnCl. The relative deuterium uptake difference is plotted as different peptide regions. The large difference indicates the regions (red) having less stable H-bonding or more relative solvent accessibilities in the presence of denaturant.

Supplemental tables

| <b>Amino acid</b> | <b>WT</b> | <b>STD</b> | <b>MM</b> | <b>STD</b> | <b>D 100%</b> | <b>Normalized MM</b> | <b>STD</b> |
|-------------------|-----------|------------|-----------|------------|---------------|----------------------|------------|
| <b>V6</b>         | 0.76      | 0.11       | 0.79      | 0.08       | 0.78          | 1.01                 | 0.10       |
| <b>E7</b>         | 0.78      | 0.07       | 0.88      | 0.10       | 0.93          | 0.95                 | 0.11       |
| <b>T8</b>         | 0.87      | 0.06       | 0.87      | 0.08       | 0.82          | 1.06                 | 0.10       |
| <b>E9</b>         | 0.15      | 0.14       | 0.22      | 0.18       | 0.31          | 0.71                 | 0.11       |
| <b>E11</b>        | 0.98      | 0.02       | 0.76      | 0.11       | 1.01          | 0.75                 | 0.11       |
| <b>E13</b>        | 0.99      | 0.12       | 0.82      | 0.07       | 0.98          | 0.84                 | 0.07       |
| <b>L14</b>        | 0.99      | 0.02       | 0.90      | 0.03       | 1.00          | 0.90                 | 0.03       |
| <b>Q16</b>        | 1.01      | 0.09       | 0.94      | 0.02       | 0.99          | 0.95                 | 0.02       |
| <b>Q17</b>        | 0.84      | 0.04       | 0.79      | 0.08       | 0.80          | 0.99                 | 0.10       |
| <b>T18</b>        | 1.00      | 0.17       | 0.83      | 0.11       | 0.88          | 0.94                 | 0.13       |
| <b>E19</b>        | 0.90      | 0.05       | 0.93      | 0.07       | 0.95          | 0.98                 | 0.07       |
| <b>W20</b>        | 0.20      | 0.08       | 0.08      | 0.03       | 0.11          | 0.73                 | 0.02       |
| <b>Q21</b>        | 0.77      | 0.03       | 0.90      | 0.07       | 0.93          | 0.97                 | 0.08       |
| <b>S22</b>        | 0.83      | 0.13       | 0.97      | 0.04       | 0.98          | 0.99                 | 0.04       |
| <b>R25</b>        | 0.97      | 0.12       | 0.93      | 0.07       | 1.00          | 0.93                 | 0.07       |
| <b>W26</b>        | 0.94      | 0.05       | 0.90      | 0.02       | 0.98          | 0.92                 | 0.02       |
| <b>E45</b>        | 0.09      | 0.02       | 0.01      | 0.02       | 0.98          | 0.01                 | 0.02       |
| <b>E70</b>        | 0.10      | 0.02       | 0.06      | 0.02       | 0.94          | 0.06                 | 0.02       |
| <b>L71</b>        | 0.10      | 0.04       | 0.06      | 0.06       | 1.08          | 0.05                 | 0.06       |
| <b>K72</b>        | 0.17      | 0.01       | 0.18      | 0.04       | 0.89          | 0.20                 | 0.05       |
| <b>A73</b>        | 0.16      | 0.05       | 0.15      | 0.02       | 1.00          | 0.15                 | 0.02       |
| <b>Y74</b>        | 0.13      | 0.07       | 0.16      | 0.03       | 1.02          | 0.16                 | 0.03       |
| <b>K75</b>        | 0.05      | 0.07       | 0.17      | 0.02       | 1.00          | 0.17                 | 0.02       |
| <b>S76</b>        | 0.95      | 0.02       | 0.98      | 0.02       | 0.97          | 1.01                 | 0.02       |
| <b>E77</b>        | 0.88      | 0.09       | 0.92      | 0.08       | 0.99          | 0.93                 | 0.08       |
| <b>L78</b>        | 0.89      | 0.10       | 0.95      | 0.03       | 0.98          | 0.97                 | 0.03       |
| <b>E80</b>        | 0.95      | 0.05       | 0.99      | 0.03       | 0.99          | 1.00                 | 0.03       |
| <b>Q81</b>        | 0.20      | 0.08       | 0.16      | 0.02       | 1.00          | 0.16                 | 0.02       |
| <b>T83</b>        | 0.92      | 0.04       | 0.97      | 0.05       | 0.98          | 0.99                 | 0.05       |
| <b>V85</b>        | 0.86      | 0.14       | 1.09      | 0.02       | 0.99          | 1.10                 | 0.02       |
| <b>A86</b>        | 0.18      | 0.07       | 0.15      | 0.04       | 1.02          | 0.15                 | 0.04       |

|             |      |      |      |      |      |      |      |
|-------------|------|------|------|------|------|------|------|
| <b>E87</b>  | 0.79 | 0.04 | 0.80 | 0.08 | 0.95 | 0.84 | 0.08 |
| <b>E88</b>  | 0.92 | 0.04 | 0.87 | 0.13 | 0.85 | 1.02 | 0.15 |
| <b>T89</b>  | 0.98 | 0.06 | 0.94 | 0.03 | 0.95 | 0.99 | 0.03 |
| <b>R90</b>  | 0.89 | 0.14 | 0.91 | 0.05 | 0.92 | 0.99 | 0.05 |
| <b>A91</b>  | 0.95 | 0.02 | 0.96 | 0.02 | 0.93 | 1.03 | 0.02 |
| <b>R92</b>  | 0.10 | 0.08 | 0.06 | 0.07 | 1.02 | 0.06 | 0.07 |
| <b>L93</b>  | 0.08 | 0.04 | 0.16 | 0.08 | 1.03 | 0.16 | 0.07 |
| <b>L97</b>  | 0.17 | 0.01 | 0.12 | 0.04 | 0.99 | 0.12 | 0.04 |
| <b>Q98</b>  | 0.07 | 0.11 | 0.08 | 0.06 | 0.98 | 0.08 | 0.06 |
| <b>R103</b> | 0.72 | 0.02 | 0.79 | 0.02 | 1.00 | 0.79 | 0.02 |
| <b>L104</b> | 0.92 | 0.08 | 1.05 | 0.05 | 0.99 | 1.06 | 0.05 |
| <b>Q117</b> | 0.18 | 0.01 | 0.15 | 0.03 | 0.98 | 0.15 | 0.03 |
| <b>Y118</b> | 0.13 | 0.08 | 0.04 | 0.11 | 0.78 | 0.05 | 0.14 |
| <b>R119</b> | 0.76 | 0.07 | 0.73 | 0.03 | 1.04 | 0.71 | 0.03 |
| <b>E121</b> | 0.14 | 0.10 | 0.15 | 0.08 | 0.89 | 0.17 | 0.09 |
| <b>V122</b> | 0.15 | 0.04 | 0.13 | 0.02 | 0.88 | 0.15 | 0.02 |
| <b>Q123</b> | 0.13 | 0.02 | 0.11 | 0.03 | 0.66 | 0.17 | 0.05 |
| <b>A124</b> | 1.01 | 0.07 | 1.00 | 0.05 | 0.99 | 1.02 | 0.05 |
| <b>M125</b> | 0.75 | 0.04 | 0.75 | 0.08 | 0.72 | 1.05 | 0.11 |
| <b>L133</b> | 0.83 | 0.08 | 0.87 | 0.02 | 0.89 | 0.98 | 0.02 |
| <b>Q163</b> | 0.02 | 0.01 | 0.01 | 0.01 | 0.77 | 0.01 | 0.01 |
| <b>A164</b> | 0.99 | 0.01 | 1.07 | 0.00 | 0.99 | 1.08 | 0.00 |
| <b>G165</b> | 0.96 | 0.10 | 0.91 | 0.06 | 1.00 | 0.91 | 0.06 |
| <b>A166</b> | 0.77 | 0.12 | 0.78 | 0.03 | 0.81 | 0.96 | 0.04 |
| <b>R167</b> | 0.77 | 0.02 | 0.74 | 0.03 | 0.70 | 1.06 | 0.04 |
| <b>E168</b> | 0.88 | 0.01 | 0.89 | 0.07 | 1.01 | 0.88 | 0.06 |
| <b>G169</b> | 0.89 | 0.10 | 0.90 | 0.03 | 1.00 | 0.90 | 0.03 |
| <b>A170</b> | 0.74 | 0.04 | 0.71 | 0.08 | 0.74 | 0.96 | 0.11 |
| <b>E171</b> | 0.86 | 0.02 | 0.84 | 0.12 | 0.93 | 0.91 | 0.13 |
| <b>R172</b> | 0.91 | 0.06 | 0.93 | 0.11 | 0.97 | 0.96 | 0.11 |
| <b>G173</b> | 0.92 | 0.04 | 0.97 | 0.08 | 0.99 | 0.98 | 0.08 |
| <b>L174</b> | 0.70 | 0.08 | 0.99 | 0.11 | 1.00 | 0.99 | 0.11 |
| <b>S175</b> | 0.07 | 0.06 | 0.08 | 0.03 | 0.33 | 0.24 | 0.10 |
| <b>A176</b> | 0.84 | 0.01 | 0.86 | 0.03 | 0.88 | 0.98 | 0.04 |
| <b>E179</b> | 0.89 | 0.02 | 0.89 | 0.06 | 0.99 | 0.90 | 0.06 |

|             |      |      |      |      |      |      |      |
|-------------|------|------|------|------|------|------|------|
| <b>R180</b> | 0.23 | 0.07 | 0.22 | 0.02 | 0.31 | 0.71 | 0.06 |
| <b>G182</b> | 0.88 | 0.13 | 0.80 | 0.02 | 0.84 | 0.95 | 0.02 |
| <b>V185</b> | 0.74 | 0.08 | 0.99 | 0.06 | 0.97 | 1.02 | 0.06 |
| <b>Q187</b> | 1.01 | 0.05 | 0.98 | 0.03 | 0.93 | 1.05 | 0.03 |
| <b>G188</b> | 0.82 | 0.07 | 0.85 | 0.08 | 0.99 | 0.86 | 0.08 |
| <b>R189</b> | 0.76 | 0.11 | 0.83 | 0.11 | 0.88 | 0.94 | 0.12 |
| <b>V190</b> | 0.94 | 0.02 | 0.97 | 0.05 | 0.98 | 0.99 | 0.05 |
| <b>R191</b> | 0.74 | 0.10 | 1.00 | 0.02 | 1.02 | 0.99 | 0.01 |
| <b>T194</b> | 0.28 | 0.06 | 0.32 | 0.01 | 0.47 | 0.69 | 0.02 |
| <b>S197</b> | 0.98 | 0.04 | 0.77 | 0.05 | 0.98 | 0.79 | 0.05 |
| <b>L198</b> | 0.91 | 0.03 | 0.90 | 0.02 | 0.96 | 0.93 | 0.02 |
| <b>A199</b> | 0.08 | 0.05 | 0.14 | 0.04 | 0.91 | 0.15 | 0.05 |
| <b>G200</b> | 0.08 | 0.04 | 0.03 | 0.02 | 0.76 | 0.04 | 0.03 |
| <b>Q201</b> | 0.16 | 0.12 | 0.08 | 0.04 | 0.98 | 0.08 | 0.04 |
| <b>L203</b> | 0.86 | 0.06 | 0.88 | 0.03 | 1.02 | 0.87 | 0.03 |
| <b>Q204</b> | 0.41 | 0.09 | 0.35 | 0.01 | 0.35 | 1.00 | 0.03 |
| <b>E205</b> | 0.85 | 0.03 | 0.99 | 0.06 | 1.01 | 0.98 | 0.06 |
| <b>Q208</b> | 0.33 | 0.03 | 0.31 | 0.01 | 0.33 | 0.94 | 0.03 |
| <b>A209</b> | 0.75 | 0.08 | 0.66 | 0.06 | 0.94 | 0.70 | 0.06 |
| <b>W210</b> | 0.01 | 0.02 | 0.04 | 0.01 | 0.05 | 0.80 | 0.10 |
| <b>G211</b> | 0.97 | 0.11 | 0.41 | 0.03 | 0.58 | 0.71 | 0.05 |
| <b>E212</b> | 0.40 | 0.01 | 0.32 | 0.02 | 0.32 | 1.00 | 0.06 |
| <b>R213</b> | 0.73 | 0.04 | 0.67 | 0.07 | 0.88 | 0.76 | 0.08 |
| <b>L214</b> | 0.99 | 0.08 | 0.98 | 0.10 | 1.01 | 0.97 | 0.10 |
| <b>S223</b> | 0.02 | 0.05 | 0.06 | 0.04 | 0.93 | 0.06 | 0.04 |
| <b>R224</b> | 0.19 | 0.05 | 0.05 | 0.01 | 0.89 | 0.05 | 0.01 |
| <b>T225</b> | 0.79 | 0.09 | 1.00 | 0.04 | 1.00 | 1.00 | 0.04 |
| <b>R226</b> | 0.97 | 0.05 | 0.77 | 0.13 | 0.95 | 0.81 | 0.13 |
| <b>D227</b> | 0.91 | 0.03 | 0.99 | 0.08 | 1.02 | 0.97 | 0.08 |
| <b>L228</b> | 0.94 | 0.08 | 0.80 | 0.11 | 0.98 | 0.82 | 0.11 |
| <b>V232</b> | 0.02 | 0.01 | 0.90 | 0.10 | 1.02 | 0.88 | 0.10 |
| <b>K233</b> | 0.11 | 0.02 | 0.91 | 0.10 | 0.96 | 0.95 | 0.10 |
| <b>E234</b> | 0.83 | 0.02 | 0.86 | 0.03 | 0.96 | 0.90 | 0.03 |
| <b>Q235</b> | 0.10 | 0.04 | 0.92 | 0.10 | 1.01 | 0.91 | 0.10 |
| <b>E238</b> | 0.09 | 0.03 | 0.83 | 0.05 | 0.95 | 0.88 | 0.05 |

|              |      |      |      |      |      |      |      |
|--------------|------|------|------|------|------|------|------|
| <b>V239</b>  | 0.08 | 0.04 | 0.85 | 0.09 | 0.85 | 1.01 | 0.11 |
| <b>R240</b>  | 0.03 | 0.01 | 0.78 | 0.06 | 0.92 | 0.85 | 0.07 |
| <b>A241</b>  | 0.13 | 0.03 | 0.82 | 0.05 | 1.00 | 0.82 | 0.05 |
| <b>K242</b>  | 0.87 | 0.01 | 0.82 | 0.03 | 0.93 | 0.88 | 0.03 |
| <b>L243</b>  | 0.03 | 0.01 | 0.97 | 0.04 | 1.02 | 0.95 | 0.04 |
| <b>E244</b>  | 0.97 | 0.10 | 0.95 | 0.12 | 1.00 | 0.95 | 0.12 |
| <b>E245</b>  | 0.15 | 0.04 | 0.10 | 0.01 | 0.16 | 0.64 | 0.06 |
| <b>Q246</b>  | 0.09 | 0.07 | 0.98 | 0.10 | 0.99 | 1.00 | 0.10 |
| <b>A247</b>  | 0.90 | 0.06 | 1.01 | 0.04 | 0.95 | 1.07 | 0.04 |
| <b>Q248</b>  | 0.06 | 0.05 | 0.12 | 0.02 | 0.31 | 0.39 | 0.07 |
| <b>S263</b>  | 0.14 | 0.03 | 0.87 | 0.06 | 0.92 | 0.95 | 0.07 |
| <b>W264R</b> | 0.13 | 0.02 | 0.94 | 0.03 | 0.99 | 0.95 | 0.03 |
| <b>F265</b>  | 0.09 | 0.01 | 0.77 | 0.03 | 0.89 | 0.87 | 0.03 |
| <b>L268</b>  | 0.05 | 0.01 | 0.32 | 0.01 | 0.45 | 0.71 | 0.03 |
| <b>V269</b>  | 0.08 | 0.03 | 0.10 | 0.01 | 0.10 | 1.00 | 0.10 |
| <b>E270</b>  | 0.03 | 0.03 | 1.01 | 0.05 | 0.99 | 1.02 | 0.05 |
| <b>Q275</b>  | 0.78 | 0.05 | 0.98 | 0.04 | 0.99 | 0.99 | 0.04 |
| <b>W276</b>  | 0.82 | 0.06 | 0.73 | 0.06 | 0.81 | 0.90 | 0.07 |
| <b>A277</b>  | 0.31 | 0.08 | 0.89 | 0.06 | 0.93 | 0.96 | 0.06 |
| <b>G278</b>  | 0.94 | 0.02 | 0.89 | 0.01 | 0.92 | 0.97 | 0.01 |
| <b>L279Q</b> | 0.07 | 0.06 | 0.95 | 0.04 | 1.02 | 0.93 | 0.04 |
| <b>A285</b>  | 0.95 | 0.08 | 0.83 | 0.10 | 0.89 | 0.93 | 0.11 |
| <b>G288</b>  | 0.70 | 0.02 | 0.99 | 0.10 | 0.93 | 1.06 | 0.10 |
| <b>T289</b>  | 1.08 | 0.03 | 0.70 | 0.03 | 0.71 | 0.98 | 0.04 |
| <b>S290</b>  | 0.84 | 0.10 | 1.05 | 0.03 | 1.01 | 1.04 | 0.03 |
| <b>A291</b>  | 0.42 | 0.07 | 0.82 | 0.05 | 0.81 | 1.01 | 0.06 |
| <b>A292</b>  | 0.91 | 0.06 | 0.81 | 0.04 | 0.89 | 0.90 | 0.04 |
| <b>V294</b>  | 0.87 | 0.06 | 0.87 | 0.03 | 0.92 | 0.95 | 0.03 |
| <b>D297</b>  | 0.63 | 0.10 | 0.44 | 0.05 | 0.58 | 0.76 | 0.09 |
| <b>N298</b>  | 0.93 | 0.04 | 0.82 | 0.03 | 0.89 | 0.92 | 0.03 |
| <b>H299</b>  | 0.79 | 0.04 | 0.76 | 0.04 | 0.99 | 0.77 | 0.04 |

**Table S1.** A complete list of deuterium uptake for 132 residues in ApoE4.
